# Supplementary material
Source: PubMed Central journal article supplement (PMC6622509)
Supplement: jcsm.15.7.1051s1.pdf [file jcsm.15.7.1051s1.pdf]

Figure S1. Sleep stage identification by data collection method.

| Device/Method | Sleep                 |         |                 |          | Wake      |
|---------------|-----------------------|---------|-----------------|----------|-----------|
|               | N1                    | N2      | N3              | REM      |           |
| PSG           | •<br>N1               | •<br>N2 | •<br>N3         | •<br>REM | •<br>Wake |
| S+            | ←————→<br>Light Sleep |         | •<br>Deep Sleep | •<br>REM | •<br>Wake |
| Actigraphy    | ←————→<br>Sleep       |         |                 |          | •<br>Wake |

Figure S1. Outline of each state and stage that is identified by a given recording device or method. Arrows spanning more than one sleep stage indicate that a device does not distinguish between those stages. PSG: Polysomnography, N1: Non-REM Sleep Stage 1, N2: Non-REM Sleep Stage 2, N3: Non-REM Sleep Stage 3, REM: Rapid Eye Movement Sleep.

Figure S2. Consort diagram

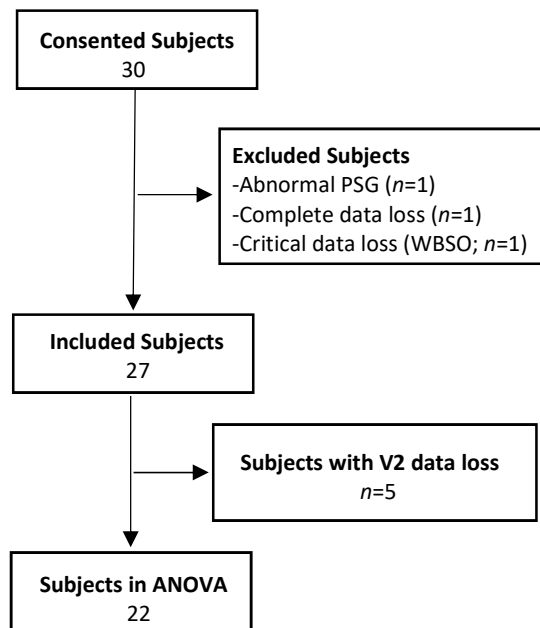

Figure S2. Outline of data included in analyses. PSG: Polysomnography, WBSO: Wake Before Sleep Onset, V2: S+ Algorithm Version 2.

Figure S3A.

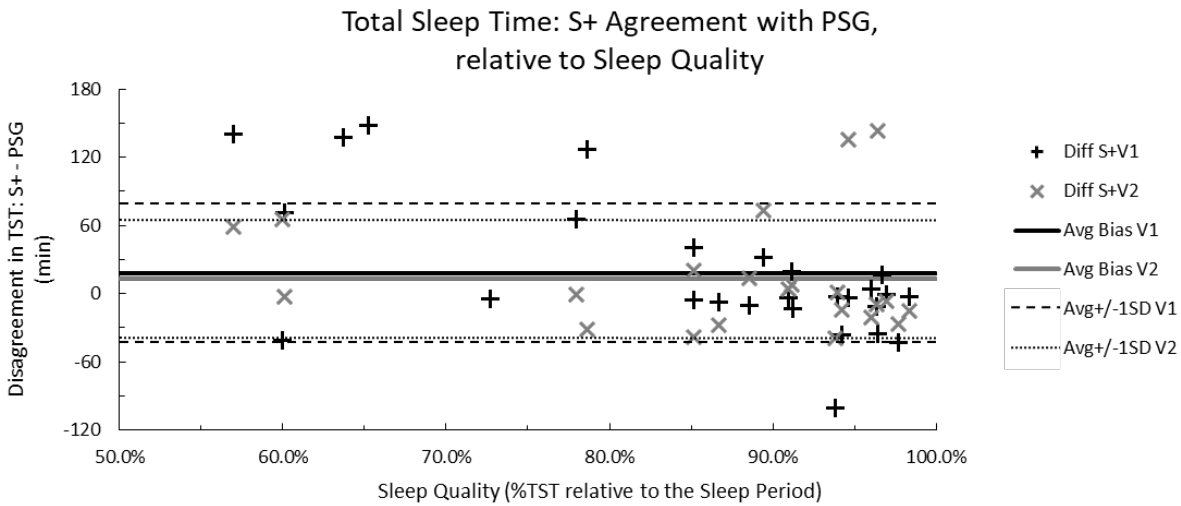

Figure S3B.

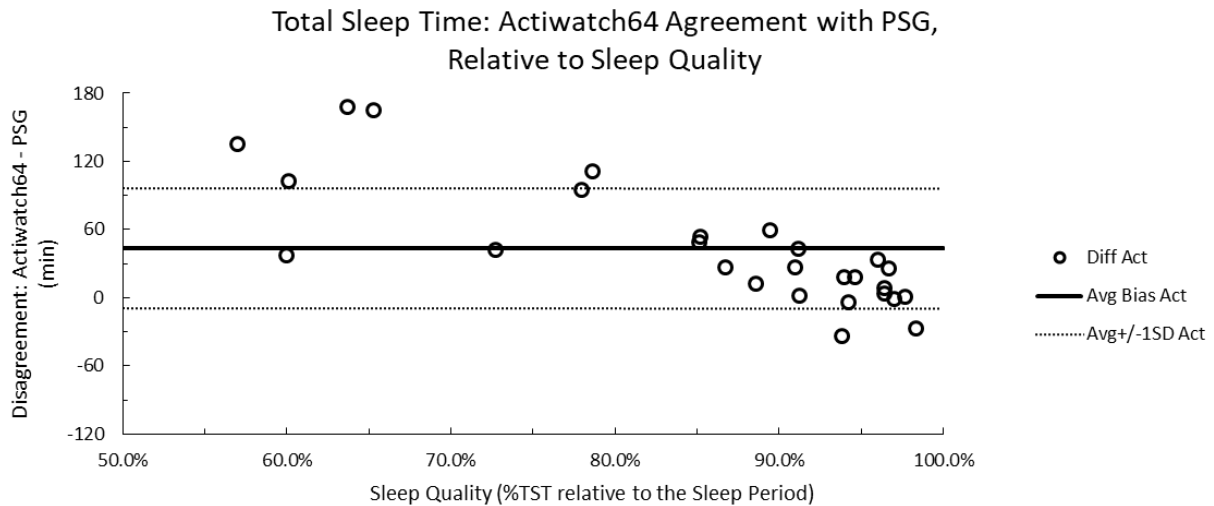

Figure S3A-B. Bland-Altman concordance between the S+ device (plot A) or Actigraphy (plot B) and PSG when detecting total sleep time, relative to Sleep Quality. Solid lines indicate average discrepancy, dashed and dotted lines indicate  $\pm 1$  standard deviation, and symbols correspond to the number of minutes (min) differing for each participant. On the ordinate, a positive difference indicates overestimation and a negative difference underestimation relative to

PSG. The range of participant total sleep time as a percentage of the sleep period (Sleep Quality), according to RPSGT-scored PSG, is on the abscissa. PSG: Polysomnography, Diff: Difference, Avg: Mean, V1: Algorithm Version 1, V2: Algorithm Version 2, SD: Standard Deviation, Act: Actigraphy, TST: Total Sleep Time.
